# Supplementary material for: Comparative Analysis of Gut Microbiota of Native Tibetan and Han Populations Living at Different Altitudes
Source: PubMed Central journal article supplement (PMC4883765; doi:10.1371/journal.pone.0155863), 2016-05-27

# RDA analysis

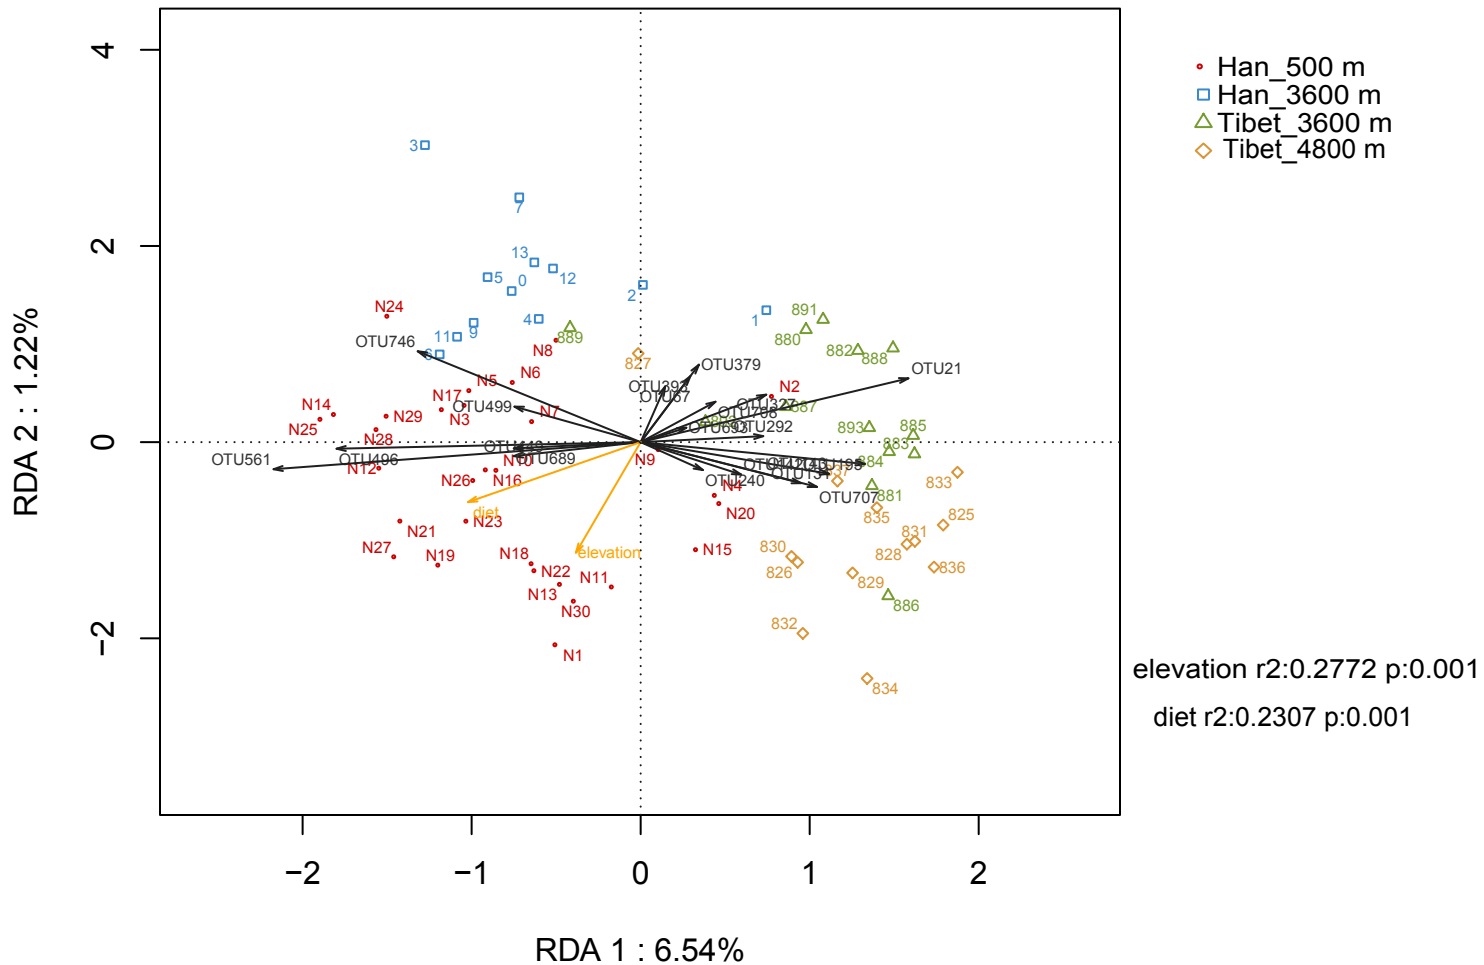

Supplement: pone.0155863.s002.pdf [file pone.0155863.s002.pdf]
